# Supplementary material for: Potassium phosphate monobasic induced decoration from the surface into the bulk lattice for Ni-rich cathode materials with enhanced cell performance
Source: Royal Society of Chemistry journal article supplement (doi:10.1039/d0se00403k), 2020-01-01
Supplement: d0se00403k1.pdf [file d0se00403k1.pdf]

## Supplementary materials

### *Potassium phosphate monobasic induced decoration from surface into bulk lattice for Ni-rich cathode materials with enhanced cell performance.*

Dianwei Zhang<sup>a</sup>, Yunjiao Li<sup>a,1</sup>, Xiaoming Xi<sup>b</sup>, Shenghong Chang<sup>a</sup>, Shan Wang<sup>a</sup>, Jiachao Yang<sup>a</sup>,

Junchao Zheng<sup>a</sup>, Wei Li<sup>c</sup>.

<sup>a</sup>School of Metallurgy and Environment, Central South University, Changsha 410083, P.R. China

<sup>b</sup>Changsha Research Institute of Mining and Metallurgy, Changsha, 410083, P.R. China

<sup>c</sup>Citic Dameng Mining Industries Limited, Nanning 530028, PR China

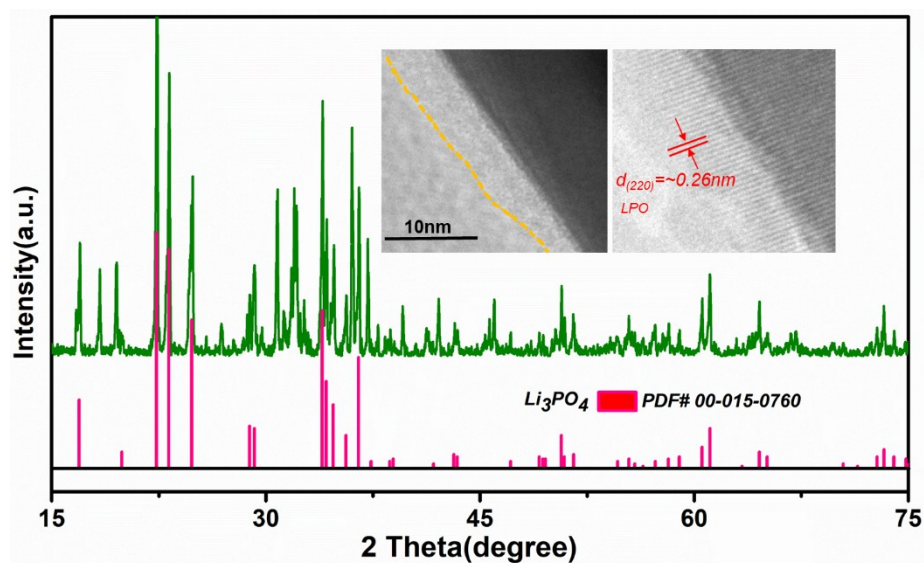

Figure S1. The XRD patterns of additional experimental product; and HRTEM image of coating layer.

<sup>1</sup>Corresponding author.

E-mail addresses: [yunjiao\\_li@csu.edu.cn](mailto:yunjiao_li@csu.edu.cn) (Y-J. Li)

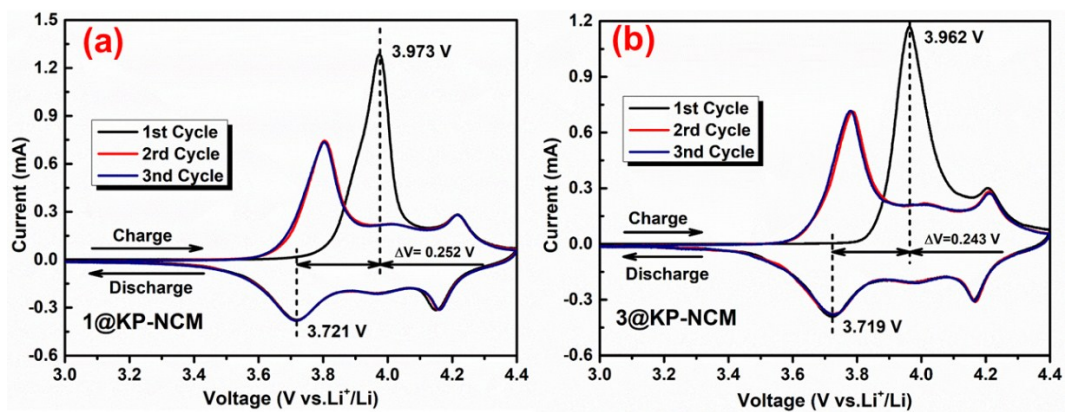

**Figure S2.** The CV curves of 1@KP-NCM (a) and 3@KP-NCM (b) tested between 3.0 and 4.4V at 0.1 mV s<sup>-1</sup>.
